# Supplementary material for: An investigation of the effects of &lt;i&gt;BMPR1B&lt;/i&gt;, &lt;i&gt;BMP15&lt;/i&gt;, and &lt;i&gt;GDF9&lt;/i&gt; genes on litter size in Ramlıç and Dağlıç sheep
Source: Copernicus journal article supplement (doi:10.5194/aab-64-223-2021), 2021-06-03
Supplement: Supplementary file [file aab-64-223-2021-supplement.pdf]

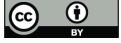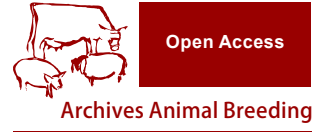

*Supplement of*

## **An investigation of the effects of *BMPR1B*, *BMP15*, and *GDF9* genes on litter size in Ramlıç and Dađlıç sheep**

**Koray Çelikelođlu et al.**

*Correspondence to:* Koray Çelikelođlu (kcelikeloglu@aku.edu.tr) and Mustafa Tekerli (tekerli@aku.edu.tr)

The copyright of individual parts of the supplement might differ from the article licence.

1 Table S1

| Gene          |                      | Forward (5'→3')        | Reverse (5'→3')        | Tm (°C) | Size (bp) |
|---------------|----------------------|------------------------|------------------------|---------|-----------|
| <b>BMPR1B</b> | Exon 9               | TGTGTCTGCTGTATTGGCACAC | GCTAGGAAACCTGAACATCG   | 59      | 419       |
|               | Exon 10              | AGACACCTATGACAAAGGACG  | GCACACAATCCCAGACATTAGC | 59      | 696       |
|               | Exon 13 <sup>a</sup> | GTATCGAGTGCCAGCCTTGCA  | TCCCACATCCTCTGAAGCTGC  | 63      | 852       |
|               | Exon 13 <sup>b</sup> | TCTGGGGATTCCCACCCATGAC | GCAAAGAAGAGGGGCTTCCCAA | 59      | 957       |
| <b>BMP15</b>  | Exon 1               | ACATGTTGCTGAACACCAAGC  | AGGCAATGTGAAGCCTGACA   | 63      | 462       |
| <b>GDF9</b>   | Exon 1               | GAATTGAACCTAGCCCACCCAC | AGCCTACATCAACCCATGAGGC | 63      | 708       |
|               | Exon 2               | AGGAACCTTTCCATCAGTGGA  | TCCTCCCAAAGGCATAGACAGG | 58      | 1043      |

2  
3  
4  
5  
6  
7  
8  
9  
10  
11  
12  
13  
14  
15  
16

1 Table S2

| SNP        | GENOTYPE | N‡ | Regression Coefficient | Standard Error | t- value | P-value related to t-value |
|------------|----------|----|------------------------|----------------|----------|----------------------------|
| g.49480C>T | CC       | 17 | -0.0609240**           | 0.184471E-01   | -3.30264 | 0.002886323                |
|            | CT       | 17 |                        |                |          |                            |
|            | TT       | 13 |                        |                |          |                            |
| g.49496G>A | GG       | 37 | 0.0827586**            | 0.275030E-01   | 3.00908  | 0.005907815                |
|            | AG       | 8  |                        |                |          |                            |
|            | AA       | 2  |                        |                |          |                            |
| c.1658A>C  | AA       | 40 | 0.131989**             | 0.332543E-01   | 3.96908  | 0.00053637                 |
|            | AC       | 6  |                        |                |          |                            |
|            | CC       | 1  |                        |                |          |                            |
| c.1875T>C  | TT       | 40 | -0.131989**            | 0.332543E-01   | 3.96908  | 0.00053637                 |
|            | CT       | 6  |                        |                |          |                            |
|            | CC       | 1  |                        |                |          |                            |
| c.1890C>T  | CC       | 40 | -0.131989**            | 0.332543E-01   | 3.96908  | 0.00053637                 |
|            | CT       | 6  |                        |                |          |                            |
|            | TT       | 1  |                        |                |          |                            |
| c.2037C>T  | CC       | 33 | 0.0903010**            | 0.317610E-01   | 2.84314  | 0.008772616                |
|            | CT       | 14 |                        |                |          |                            |
| c.2053C>T  | CC       | 41 | 0.145161**             | 0.348742E-01   | 4.16243  | 0.00032614                 |
|            | CT       | 5  |                        |                |          |                            |
|            | TT       | 1  |                        |                |          |                            |
| c.2070G>C  | CC       | 41 | -0.145161**            | 0.145161       | 4.16243  | 0.00032614                 |
|            | CG       | 5  |                        |                |          |                            |
|            | GG       | 1  |                        |                |          |                            |
| c.2083C>T  | CC       | 46 | -0.281250**            | 0.970857E-01   | -2.89693 | 0.007723889                |
|            | CT       | 1  |                        |                |          |                            |
| c.2129C>T  | CC       | 40 | -0.0752284*            | 0.328709E-01   | -2.2886  | 0.030824655                |
|            | CT       | 6  |                        |                |          |                            |
|            | TT       | 1  |                        |                |          |                            |
| c.2492C>T  | TT       | 38 | -0.137825**            | 0.339816E-01   | -4.05589 | 0.000429144                |
|            | CT       | 8  |                        |                |          |                            |
|            | CC       | 1  |                        |                |          |                            |
| c.2523G>A  | GG       | 38 | -0.137825**            | 0.339816E-01   | -4.05589 | 0.000429144                |
|            | AG       | 8  |                        |                |          |                            |
|            | AA       | 1  |                        |                |          |                            |
| c.2763G>A  | GG       | 38 | -0.137825**            | 0.339816E-01   | -4.05589 | 0.000429144                |
|            | AG       | 8  |                        |                |          |                            |
|            | AA       | 1  |                        |                |          |                            |
| c.2978C>T  | CC       | 44 | -0.207493**            | 0.589651E-01   | -3.51891 | 0.001683673                |
|            | CT       | 3  |                        |                |          |                            |

2 \*P<0.05 \*\* P<0.01 N‡: number of sheep carrying related genotype

3

4

1 Table S3

| SNP       | GENOTYPE | N‡ | Regression Coefficient | Standard Error | t- value | P-value related to t-value |
|-----------|----------|----|------------------------|----------------|----------|----------------------------|
| c.1487C>A | CC       | 28 | 0.0559284**            | 0.202225E-01   | 2.76566  | 0.009626563                |
|           | AC       | 20 |                        |                |          |                            |
|           | AA       | 6  |                        |                |          |                            |
| c.1658A>C | AA       | 44 | -0.0940439**           | 0.338538E-01   | -2.77794 | 0.00934298                 |
|           | AC       | 10 |                        |                |          |                            |
| c.1659T>A | TT       | 44 | -0.0940439**           | 0.338538E-01   | -2.77794 | 0.00934298                 |
|           | AT       | 10 |                        |                |          |                            |
| c.1875T>C | TT       | 44 | -0.0940439**           | 0.338538E-01   | -2.77794 | 0.00934298                 |
|           | CT       | 10 |                        |                |          |                            |
| c.1890C>T | CC       | 44 | -0.0940439**           | 0.338538E-01   | -2.77794 | 0.00934298                 |
|           | CT       | 10 |                        |                |          |                            |
| c.2053C>T | CC       | 44 | -0.0940439**           | 0.338538E-01   | -2.77794 | 0.00934298                 |
|           | CT       | 10 |                        |                |          |                            |
| c.2070G>C | CC       | 44 | -0.0940439**           | 0.338538E-01   | -2.77794 | 0.00934298                 |
|           | CG       | 10 |                        |                |          |                            |
| c.2880A>G | AA       | 48 | 0.0980392*             | 0.423339E-01   | 2.31586  | 0.027584943                |
|           | AG       | 6  |                        |                |          |                            |
| c.2978C>T | CC       | 46 | -0.0933707*            | 0.369520E-01   | -2.52681 | 0.017018393                |
|           | CT       | 8  |                        |                |          |                            |

2 \*P&lt;0.05 \*\* P&lt;0.01 N‡: number of sheep carrying related genotype

3

4

5

6

7

8 Table S4

| SNP           | GENOTYPE | N‡ | Regression Coefficient | Standard Error | t- value | P-value related to t-value |
|---------------|----------|----|------------------------|----------------|----------|----------------------------|
| c.28_30delCTT | CTTCTT   | 32 | 0.117449**             | 0.216316E-01   | 5.42949  | 0.0000018409               |
|               | CTTdel   | 15 |                        |                |          |                            |
|               | deldel   | 4  |                        |                |          |                            |
| c.199C>T      | CC       | 50 | -0.272727**            | 0.0970411      | -2.81043 | 0.0071401619               |
|               | CT       | 1  |                        |                |          |                            |

9 \*\* P&lt;0.01 N‡: number of sheep carrying related genotype

10

11

12 Table S5

| SNP      | GENOTYPE | N‡ | Regression Coefficient | Standard Error | t- value | P-value related to t-value |
|----------|----------|----|------------------------|----------------|----------|----------------------------|
| g.383G>A | GG       | 51 | -0.135135*             | 0.0573907      | -2.3547  | 0.022591054                |
|          | GA       | 3  |                        |                |          |                            |

13

14 \* P&lt;0.05 N‡: number of sheep carrying related genotype
